# Supplementary material
Source: PubMed Central journal article supplement (PMC8027454)
Supplement: 41437_2020_386_MOESM1_ESM.pdf [file 41437_2020_386_MOESM1_ESM.pdf]

**Variable levels of introgression between the endangered *Podarcis carbonelli* and highly divergent congeneric species**

**– Supplementary Information**

Guilherme Caeiro-Dias, Alan Brelsford, Antigoni Kaliontzopoulou,  
Mariana Meneses-Ribeiro, Pierre-André Crochet, Catarina Pinho

**Table S1.** Samples used to analyse each *Podarcis* contact zone, with the corresponding morphological identification (Field ID; *Podarcis* sp. was used when specific identification was not possible), age class (A – adult; S – sub-adult; J - juvenile), sex (F - female; M – male; Unk – unknown; ND – no data), geographical coordinates and location names where the samples were collected. In the second column CZ refers to the samples from the populations of contact and REF to the samples used as references; contact zone numbers and reference population Roman numerals as in Fig. 1.

| Sample label | Contact zone analysed | Field ID             | Age class | Sex | Lat.   | Long.  | Location name (country) |
|--------------|-----------------------|----------------------|-----------|-----|--------|--------|-------------------------|
| DB19668      | CZ 1                  | <i>P. bocagei</i>    | S         | M   | 41.031 | -8.646 | Espinho (Portugal)      |
| DB19607      | CZ 1                  | <i>P. bocagei</i>    | A         | F   | 41.031 | -8.645 | Espinho (Portugal)      |
| DB19682      | CZ 1                  | <i>P. bocagei</i>    | A         | F   | 41.031 | -8.645 | Espinho (Portugal)      |
| DB19681      | CZ 1                  | <i>P. carbonelli</i> | A         | F   | 41.030 | -8.645 | Espinho (Portugal)      |
| DB19683      | CZ 1                  | <i>P. carbonelli</i> | A         | M   | 41.030 | -8.645 | Espinho (Portugal)      |
| DB19552      | CZ 1                  | <i>P. carbonelli</i> | A         | M   | 41.030 | -8.646 | Espinho (Portugal)      |
| DB19555      | CZ 1                  | <i>P. carbonelli</i> | A         | M   | 41.030 | -8.645 | Espinho (Portugal)      |
| DB21509      | CZ 1                  | <i>Podarcis</i> sp.  | J         | Unk | 41.029 | -8.645 | Espinho (Portugal)      |
| DB19602      | CZ 1                  | <i>P. carbonelli</i> | A         | M   | 41.029 | -8.645 | Espinho (Portugal)      |
| DB21508      | CZ 1                  | <i>P. carbonelli</i> | A         | M   | 41.029 | -8.645 | Espinho (Portugal)      |
| DB19579      | CZ 1                  | <i>P. carbonelli</i> | A         | F   | 41.029 | -8.645 | Espinho (Portugal)      |
| DB19598      | CZ 1                  | <i>P. carbonelli</i> | A         | F   | 41.029 | -8.645 | Espinho (Portugal)      |
| DB19600      | CZ 1                  | <i>P. carbonelli</i> | A         | F   | 41.029 | -8.645 | Espinho (Portugal)      |
| DB19588      | CZ 1                  | <i>P. carbonelli</i> | A         | F   | 41.029 | -8.645 | Espinho (Portugal)      |
| DB19551      | CZ 1                  | <i>P. carbonelli</i> | A         | M   | 41.029 | -8.645 | Espinho (Portugal)      |
| DB19563      | CZ 1                  | <i>P. carbonelli</i> | A         | F   | 41.029 | -8.645 | Espinho (Portugal)      |
| DB19553      | CZ 1                  | <i>P. carbonelli</i> | A         | F   | 41.029 | -8.645 | Espinho (Portugal)      |
| DB21505      | CZ 1                  | <i>Podarcis</i> sp.  | J         | Unk | 41.029 | -8.645 | Espinho (Portugal)      |
| DB19582      | CZ 1                  | <i>P. bocagei</i>    | A         | M   | 41.029 | -8.645 | Espinho (Portugal)      |
| DB19585      | CZ 1                  | <i>P. carbonelli</i> | A         | M   | 41.029 | -8.646 | Espinho (Portugal)      |
| DB19566      | CZ 1                  | <i>P. carbonelli</i> | A         | M   | 41.029 | -8.645 | Espinho (Portugal)      |
| DB19556      | CZ 1                  | <i>P. carbonelli</i> | A         | F   | 41.029 | -8.646 | Espinho (Portugal)      |
| DB19945      | CZ 1                  | <i>P. bocagei</i>    | A         | F   | 41.029 | -8.645 | Espinho (Portugal)      |
| DB21513      | CZ 1                  | <i>Podarcis</i> sp.  | J         | Unk | 41.029 | -8.645 | Espinho (Portugal)      |
| DB21511      | CZ 1                  | <i>Podarcis</i> sp.  | J         | Unk | 41.029 | -8.645 | Espinho (Portugal)      |
| DB19559      | CZ 1                  | <i>P. carbonelli</i> | A         | F   | 41.029 | -8.645 | Espinho (Portugal)      |
| DB21512      | CZ 1                  | <i>Podarcis</i> sp.  | J         | Unk | 41.029 | -8.645 | Espinho (Portugal)      |
| DB19564      | CZ 1                  | <i>P. carbonelli</i> | A         | M   | 41.029 | -8.646 | Espinho (Portugal)      |
| DB19554      | CZ 1                  | <i>P. carbonelli</i> | A         | F   | 41.029 | -8.645 | Espinho (Portugal)      |
| DB19929      | CZ 1                  | <i>Podarcis</i> sp.  | J         | Unk | 41.029 | -8.645 | Espinho (Portugal)      |
| DB21510      | CZ 1                  | <i>Podarcis</i> sp.  | J         | Unk | 41.029 | -8.645 | Espinho (Portugal)      |
| DB19712      | CZ 1                  | <i>P. carbonelli</i> | A         | F   | 41.028 | -8.645 | Espinho (Portugal)      |
| DB21503      | CZ 1                  | <i>Podarcis</i> sp.  | J         | Unk | 41.028 | -8.645 | Espinho (Portugal)      |
| DB19949      | CZ 1                  | <i>Podarcis</i> sp.  | J         | Unk | 41.028 | -8.645 | Espinho (Portugal)      |
| DB19720      | CZ 1                  | <i>P. carbonelli</i> | A         | F   | 41.028 | -8.646 | Espinho (Portugal)      |
| DB19597      | CZ 1                  | <i>P. carbonelli</i> | A         | M   | 41.028 | -8.645 | Espinho (Portugal)      |
| DB19584      | CZ 1                  | <i>P. carbonelli</i> | A         | M   | 41.028 | -8.645 | Espinho (Portugal)      |
| DB19947      | CZ 1                  | <i>Podarcis</i> sp.  | J         | Unk | 41.028 | -8.645 | Espinho (Portugal)      |
| DB19924      | CZ 1                  | <i>Podarcis</i> sp.  | J         | Unk | 41.028 | -8.646 | Espinho (Portugal)      |
| DB19587      | CZ 1                  | <i>P. carbonelli</i> | A         | M   | 41.028 | -8.645 | Espinho (Portugal)      |
| DB19946      | CZ 1                  | <i>Podarcis</i> sp.  | J         | Unk | 41.028 | -8.645 | Espinho (Portugal)      |
| DB19557      | CZ 1                  | <i>P. carbonelli</i> | A         | F   | 41.028 | -8.645 | Espinho (Portugal)      |
| DB21502      | CZ 1                  | <i>P. carbonelli</i> | A         | M   | 41.028 | -8.645 | Espinho (Portugal)      |
| DB19711      | CZ 1                  | <i>P. carbonelli</i> | A         | F   | 41.028 | -8.645 | Espinho (Portugal)      |
| DB19569      | CZ 1                  | <i>P. carbonelli</i> | A         | F   | 41.028 | -8.646 | Espinho (Portugal)      |
| DB19580      | CZ 1                  | <i>P. carbonelli</i> | A         | M   | 41.028 | -8.646 | Espinho (Portugal)      |
| DB19935      | CZ 1                  | <i>Podarcis</i> sp.  | J         | Unk | 41.028 | -8.646 | Espinho (Portugal)      |
| DB19593      | CZ 1                  | <i>P. carbonelli</i> | A         | M   | 41.028 | -8.646 | Espinho (Portugal)      |
| DB19562      | CZ 1                  | <i>P. carbonelli</i> | A         | M   | 41.028 | -8.646 | Espinho (Portugal)      |
| DB19936      | CZ 1                  | <i>Podarcis</i> sp.  | J         | Unk | 41.028 | -8.645 | Espinho (Portugal)      |
| DB19586      | CZ 1                  | <i>P. carbonelli</i> | A         | F   | 41.028 | -8.645 | Espinho (Portugal)      |
| DB19595      | CZ 1                  | <i>P. carbonelli</i> | A         | M   | 41.028 | -8.645 | Espinho (Portugal)      |
| DB19940      | CZ 1                  | <i>P. carbonelli</i> | A         | M   | 41.028 | -8.644 | Espinho (Portugal)      |
| DB19942      | CZ 1                  | <i>P. carbonelli</i> | A         | F   | 41.028 | -8.644 | Espinho (Portugal)      |
| DB21514      | CZ 1                  | <i>Podarcis</i> sp.  | J         | Unk | 41.028 | -8.645 | Espinho (Portugal)      |
| DB19567      | CZ 1                  | <i>P. carbonelli</i> | A         | M   | 41.028 | -8.645 | Espinho (Portugal)      |
| DB19561      | CZ 1                  | <i>P. carbonelli</i> | A         | F   | 41.028 | -8.645 | Espinho (Portugal)      |
| DB19571      | CZ 1                  | <i>P. carbonelli</i> | A         | M   | 41.028 | -8.645 | Espinho (Portugal)      |

| Sample label | Contact zone analysed | Field ID             | Age class | Sex | Lat.   | Long.  | Location name (country)         |
|--------------|-----------------------|----------------------|-----------|-----|--------|--------|---------------------------------|
| DB19925      | CZ 1                  | <i>Podarcis sp.</i>  | J         | Unk | 41.028 | -8.645 | Espinho (Portugal)              |
| DB19944      | CZ 1                  | <i>P. carbonelli</i> | A         | F   | 41.028 | -8.645 | Espinho (Portugal)              |
| DB19592      | CZ 1                  | <i>P. carbonelli</i> | A         | F   | 41.028 | -8.645 | Espinho (Portugal)              |
| DB19572      | CZ 1                  | <i>P. carbonelli</i> | A         | F   | 41.028 | -8.646 | Espinho (Portugal)              |
| DB19926      | CZ 1                  | <i>Podarcis sp.</i>  | J         | Unk | 41.027 | -8.645 | Espinho (Portugal)              |
| DB19581      | CZ 1                  | <i>P. carbonelli</i> | A         | Unk | 41.027 | -8.655 | Espinho (Portugal)              |
| DB21501      | CZ 1                  | <i>P. carbonelli</i> | A         | F   | 41.027 | -8.645 | Espinho (Portugal)              |
| DB19699      | CZ 1                  | <i>P. carbonelli</i> | A         | M   | 41.027 | -8.646 | Espinho (Portugal)              |
| DB19932      | CZ 1                  | <i>Podarcis sp.</i>  | J         | Unk | 41.027 | -8.645 | Espinho (Portugal)              |
| DB19698      | CZ 1                  | <i>P. carbonelli</i> | A         | F   | 41.027 | -8.646 | Espinho (Portugal)              |
| DB19591      | CZ 1                  | <i>P. carbonelli</i> | A         | M   | 41.027 | -8.645 | Espinho (Portugal)              |
| DB19599      | CZ 1                  | <i>P. carbonelli</i> | A         | F   | 41.027 | -8.645 | Espinho (Portugal)              |
| DB19719      | CZ 1                  | <i>P. bocagei</i>    | A         | M   | 41.027 | -8.646 | Espinho (Portugal)              |
| DB19603      | CZ 1                  | <i>P. carbonelli</i> | S         | Unk | 41.027 | -8.645 | Espinho (Portugal)              |
| DB19565      | CZ 1                  | <i>P. carbonelli</i> | A         | M   | 41.027 | -8.645 | Espinho (Portugal)              |
| DB19590      | CZ 1                  | <i>P. carbonelli</i> | A         | F   | 41.027 | -8.645 | Espinho (Portugal)              |
| DB19594      | CZ 1                  | <i>P. carbonelli</i> | A         | F   | 41.027 | -8.645 | Espinho (Portugal)              |
| DB19938      | CZ 1                  | <i>Podarcis sp.</i>  | J         | Unk | 41.027 | -8.645 | Espinho (Portugal)              |
| DB19927      | CZ 1                  | <i>Podarcis sp.</i>  | J         | Unk | 41.027 | -8.644 | Espinho (Portugal)              |
| DB19576      | CZ 1                  | <i>P. carbonelli</i> | A         | M   | 41.027 | -8.645 | Espinho (Portugal)              |
| DB21507      | CZ 1                  | <i>P. carbonelli</i> | A         | M   | 41.027 | -8.645 | Espinho (Portugal)              |
| DB19589      | CZ 1                  | <i>P. carbonelli</i> | A         | M   | 41.027 | -8.645 | Espinho (Portugal)              |
| DB19568      | CZ 1                  | <i>P. carbonelli</i> | A         | F   | 41.027 | -8.645 | Espinho (Portugal)              |
| DB19558      | CZ 1                  | <i>P. carbonelli</i> | A         | M   | 41.027 | -8.645 | Espinho (Portugal)              |
| DB19708      | CZ 1                  | <i>P. bocagei</i>    | A         | M   | 41.027 | -8.643 | Espinho (Portugal)              |
| DB19709      | CZ 1                  | <i>P. bocagei</i>    | A         | M   | 41.027 | -8.643 | Espinho (Portugal)              |
| DB19596      | CZ 1                  | <i>P. carbonelli</i> | A         | M   | 41.027 | -8.644 | Espinho (Portugal)              |
| DB19715      | CZ 1                  | <i>P. carbonelli</i> | A         | F   | 41.027 | -8.645 | Espinho (Portugal)              |
| DB19716      | CZ 1                  | <i>P. carbonelli</i> | A         | M   | 41.027 | -8.645 | Espinho (Portugal)              |
| DB19928      | CZ 1                  | <i>Podarcis sp.</i>  | J         | Unk | 41.027 | -8.645 | Espinho (Portugal)              |
| DB19560      | CZ 1                  | <i>P. carbonelli</i> | A         | F   | 41.027 | -8.645 | Espinho (Portugal)              |
| DB19583      | CZ 1                  | <i>P. carbonelli</i> | A         | F   | 41.027 | -8.645 | Espinho (Portugal)              |
| DB19601      | CZ 1                  | <i>P. carbonelli</i> | A         | F   | 41.027 | -8.645 | Espinho (Portugal)              |
| DB21504      | CZ 1                  | <i>Podarcis sp.</i>  | J         | Unk | 41.027 | -8.644 | Espinho (Portugal)              |
| DB19934      | CZ 1                  | <i>Podarcis sp.</i>  | J         | Unk | 41.027 | -8.645 | Espinho (Portugal)              |
| DB19697      | CZ 1                  | <i>P. carbonelli</i> | A         | M   | 41.027 | -8.645 | Espinho (Portugal)              |
| DB19577      | CZ 1                  | <i>P. carbonelli</i> | A         | M   | 41.027 | -8.645 | Espinho (Portugal)              |
| DB19948      | CZ 1                  | <i>Podarcis sp.</i>  | J         | Unk | 41.027 | -8.645 | Espinho (Portugal)              |
| DB19578      | CZ 1                  | <i>P. carbonelli</i> | A         | F   | 41.027 | -8.645 | Espinho (Portugal)              |
| DB21500      | CZ 1                  | <i>P. carbonelli</i> | A         | M   | 41.027 | -8.644 | Espinho (Portugal)              |
| DB19930      | CZ 1                  | <i>Podarcis sp.</i>  | J         | Unk | 41.027 | -8.645 | Espinho (Portugal)              |
| DB19574      | CZ 1                  | <i>P. carbonelli</i> | A         | M   | 41.026 | -8.645 | Espinho (Portugal)              |
| DB19931      | CZ 1                  | <i>Podarcis sp.</i>  | J         | Unk | 41.026 | -8.645 | Espinho (Portugal)              |
| DB19933      | CZ 1                  | <i>Podarcis sp.</i>  | J         | Unk | 41.026 | -8.644 | Espinho (Portugal)              |
| DB19723      | CZ 1                  | <i>P. carbonelli</i> | A         | M   | 41.026 | -8.645 | Espinho (Portugal)              |
| DB19701      | CZ 1                  | <i>P. carbonelli</i> | A         | M   | 41.026 | -8.645 | Espinho (Portugal)              |
| DB19727      | CZ 1                  | <i>P. bocagei</i>    | A         | M   | 41.026 | -8.645 | Espinho (Portugal)              |
| DB19705      | CZ 1                  | <i>P. carbonelli</i> | A         | F   | 41.026 | -8.645 | Espinho (Portugal)              |
| DB19726      | CZ 1                  | <i>P. bocagei</i>    | A         | F   | 41.026 | -8.644 | Espinho (Portugal)              |
| DB19707      | CZ 1                  | <i>P. bocagei</i>    | A         | M   | 41.026 | -8.644 | Espinho (Portugal)              |
| DB19724      | CZ 1                  | <i>P. bocagei</i>    | A         | F   | 41.026 | -8.644 | Espinho (Portugal)              |
| DB19718      | CZ 1                  | <i>P. bocagei</i>    | A         | F   | 41.026 | -8.644 | Espinho (Portugal)              |
| DB19704      | CZ 1                  | <i>P. carbonelli</i> | A         | F   | 41.026 | -8.645 | Espinho (Portugal)              |
| DB19703      | CZ 1                  | <i>P. carbonelli</i> | A         | F   | 41.026 | -8.644 | Espinho (Portugal)              |
| DB19610      | CZ 1                  | <i>Podarcis sp.</i>  | A         | F   | 41.025 | -8.645 | Espinho (Portugal)              |
| DB19725      | CZ 1                  | <i>P. carbonelli</i> | A         | M   | 41.025 | -8.644 | Espinho (Portugal)              |
| DB19662      | CZ 1                  | <i>P. carbonelli</i> | A         | M   | 41.025 | -8.645 | Espinho (Portugal)              |
| DB19829      | CZ 2                  | <i>P. virescens</i>  | A         | M   | 40.921 | -8.543 | Santa Maria da Feira (Portugal) |
| DB19830      | CZ 2                  | <i>P. virescens</i>  | A         | M   | 40.921 | -8.543 | Santa Maria da Feira (Portugal) |
| DB19831      | CZ 2                  | <i>P. virescens</i>  | A         | M   | 40.921 | -8.543 | Santa Maria da Feira (Portugal) |
| DB19833      | CZ 2                  | <i>P. virescens</i>  | A         | M   | 40.921 | -8.543 | Santa Maria da Feira (Portugal) |
| DB19834      | CZ 2                  | <i>P. virescens</i>  | A         | F   | 40.921 | -8.543 | Santa Maria da Feira (Portugal) |
| DB19835      | CZ 2                  | <i>P. carbonelli</i> | A         | M   | 40.921 | -8.543 | Santa Maria da Feira (Portugal) |
| DB19836      | CZ 2                  | <i>P. carbonelli</i> | A         | M   | 40.921 | -8.543 | Santa Maria da Feira (Portugal) |
| DB19837      | CZ 2                  | <i>P. carbonelli</i> | A         | M   | 40.921 | -8.543 | Santa Maria da Feira (Portugal) |
| DB19838      | CZ 2                  | <i>P. carbonelli</i> | A         | F   | 40.921 | -8.543 | Santa Maria da Feira (Portugal) |
| DB19839      | CZ 2                  | <i>P. carbonelli</i> | J         | Unk | 40.921 | -8.543 | Santa Maria da Feira (Portugal) |





| Sample label | Contact zone analysed | Field ID             | Age class | Sex | Lat.   | Long.  | Location name (country) |
|--------------|-----------------------|----------------------|-----------|-----|--------|--------|-------------------------|
| MAT_21       | CZ 4                  | <i>P. vaucheri</i>   | ND        | ND  | 37.003 | -6.563 | Matalascaña (Spain)     |
| MAT_22       | CZ 4                  | <i>P. vaucheri</i>   | ND        | ND  | 37.003 | -6.563 | Matalascaña (Spain)     |
| MAT_23       | CZ 4                  | <i>P. vaucheri</i>   | ND        | ND  | 37.003 | -6.563 | Matalascaña (Spain)     |
| MAT_24       | CZ 4                  | <i>P. vaucheri</i>   | ND        | ND  | 37.003 | -6.563 | Matalascaña (Spain)     |
| MAT_25       | CZ 4                  | <i>P. vaucheri</i>   | ND        | ND  | 37.003 | -6.563 | Matalascaña (Spain)     |
| MAT_26       | CZ 4                  | <i>P. vaucheri</i>   | ND        | ND  | 37.003 | -6.563 | Matalascaña (Spain)     |
| MAT_27       | CZ 4                  | <i>P. vaucheri</i>   | ND        | ND  | 37.003 | -6.563 | Matalascaña (Spain)     |
| MAT_28       | CZ 4                  | <i>P. vaucheri</i>   | ND        | ND  | 37.003 | -6.563 | Matalascaña (Spain)     |
| MAT_29       | CZ 4                  | <i>P. vaucheri</i>   | ND        | ND  | 37.003 | -6.563 | Matalascaña (Spain)     |
| MAT_30       | CZ 4                  | <i>Podarcis sp.</i>  | ND        | ND  | 37.003 | -6.563 | Matalascaña (Spain)     |
| MAT_31       | CZ 4                  | <i>P. vaucheri</i>   | ND        | ND  | 37.003 | -6.563 | Matalascaña (Spain)     |
| MAT_32       | CZ 4                  | <i>Podarcis sp.</i>  | ND        | ND  | 37.003 | -6.563 | Matalascaña (Spain)     |
| MAT_33       | CZ 4                  | <i>P. vaucheri</i>   | ND        | ND  | 37.003 | -6.563 | Matalascaña (Spain)     |
| MAT_34       | CZ 4                  | <i>Podarcis sp.</i>  | ND        | ND  | 37.003 | -6.563 | Matalascaña (Spain)     |
| MAT_35       | CZ 4                  | <i>Podarcis sp.</i>  | ND        | ND  | 37.003 | -6.563 | Matalascaña (Spain)     |
| MAT_36       | CZ 4                  | <i>P. vaucheri</i>   | ND        | ND  | 37.003 | -6.563 | Matalascaña (Spain)     |
| MAT_37       | CZ 4                  | <i>Podarcis sp.</i>  | ND        | ND  | 37.003 | -6.563 | Matalascaña (Spain)     |
| MAT_38       | CZ 4                  | <i>P. vaucheri</i>   | ND        | ND  | 37.003 | -6.563 | Matalascaña (Spain)     |
| MAT_39       | CZ 4                  | <i>P. vaucheri</i>   | ND        | ND  | 37.003 | -6.563 | Matalascaña (Spain)     |
| MAT_40       | CZ 4                  | <i>P. vaucheri</i>   | ND        | ND  | 37.003 | -6.563 | Matalascaña (Spain)     |
| MAT_41       | CZ 4                  | <i>Podarcis sp.</i>  | ND        | ND  | 37.003 | -6.563 | Matalascaña (Spain)     |
| MAT_42       | CZ 4                  | <i>Podarcis sp.</i>  | ND        | ND  | 37.003 | -6.563 | Matalascaña (Spain)     |
| MAT_43       | CZ 4                  | <i>Podarcis sp.</i>  | ND        | ND  | 37.003 | -6.563 | Matalascaña (Spain)     |
| MAT_44       | CZ 4                  | <i>P. vaucheri</i>   | ND        | ND  | 37.003 | -6.563 | Matalascaña (Spain)     |
| MAT_45       | CZ 4                  | <i>P. vaucheri</i>   | ND        | ND  | 37.003 | -6.563 | Matalascaña (Spain)     |
| MAT_46       | CZ 4                  | <i>P. vaucheri</i>   | ND        | ND  | 37.003 | -6.563 | Matalascaña (Spain)     |
| MAT_47       | CZ 4                  | <i>P. vaucheri</i>   | ND        | ND  | 37.003 | -6.563 | Matalascaña (Spain)     |
| MAT_48       | CZ 4                  | <i>P. vaucheri</i>   | ND        | ND  | 37.003 | -6.563 | Matalascaña (Spain)     |
| MAT_49       | CZ 4                  | <i>Podarcis sp.</i>  | ND        | ND  | 37.003 | -6.563 | Matalascaña (Spain)     |
| MAT_50       | CZ 4                  | <i>P. vaucheri</i>   | ND        | ND  | 37.003 | -6.563 | Matalascaña (Spain)     |
| MAT_51       | CZ 4                  | <i>P. vaucheri</i>   | ND        | ND  | 37.003 | -6.563 | Matalascaña (Spain)     |
| MAT_52       | CZ 4                  | <i>P. vaucheri</i>   | ND        | ND  | 37.003 | -6.563 | Matalascaña (Spain)     |
| MAT_53       | CZ 4                  | <i>Podarcis sp.</i>  | ND        | ND  | 37.003 | -6.563 | Matalascaña (Spain)     |
| MAT_54       | CZ 4                  | <i>P. vaucheri</i>   | ND        | ND  | 37.003 | -6.563 | Matalascaña (Spain)     |
| MAT_55       | CZ 4                  | <i>P. vaucheri</i>   | ND        | ND  | 37.003 | -6.563 | Matalascaña (Spain)     |
| MAT_56       | CZ 4                  | <i>Podarcis sp.</i>  | ND        | ND  | 37.003 | -6.563 | Matalascaña (Spain)     |
| MAT_57       | CZ 4                  | <i>Podarcis sp.</i>  | ND        | ND  | 37.003 | -6.563 | Matalascaña (Spain)     |
| MAT_58       | CZ 4                  | <i>Podarcis sp.</i>  | ND        | ND  | 37.003 | -6.563 | Matalascaña (Spain)     |
| MAT_59       | CZ 4                  | <i>P. vaucheri</i>   | ND        | ND  | 37.003 | -6.563 | Matalascaña (Spain)     |
| MAT_60       | CZ 4                  | <i>P. carbonelli</i> | ND        | ND  | 37.003 | -6.563 | Matalascaña (Spain)     |
| MAT_61       | CZ 4                  | <i>P. carbonelli</i> | ND        | ND  | 37.003 | -6.563 | Matalascaña (Spain)     |
| MAT_62       | CZ 4                  | <i>P. carbonelli</i> | ND        | ND  | 37.003 | -6.563 | Matalascaña (Spain)     |
| MAT_63       | CZ 4                  | <i>Podarcis sp.</i>  | ND        | ND  | 37.003 | -6.563 | Matalascaña (Spain)     |
| DB19902      | REF I (CZ 1)          | <i>P. bocagei</i>    | A         | F   | 41.153 | -8.643 | Porto (Portugal)        |
| DB19903      | REF I (CZ 1)          | <i>P. bocagei</i>    | A         | M   | 41.153 | -8.643 | Porto (Portugal)        |
| DB19904      | REF I (CZ 1)          | <i>P. bocagei</i>    | A         | M   | 41.153 | -8.643 | Porto (Portugal)        |
| DB19905      | REF I (CZ 1)          | <i>P. bocagei</i>    | A         | F   | 41.153 | -8.643 | Porto (Portugal)        |
| DB19906      | REF I (CZ 1)          | <i>P. bocagei</i>    | A         | F   | 41.153 | -8.643 | Porto (Portugal)        |
| DB19907      | REF I (CZ 1)          | <i>P. bocagei</i>    | A         | F   | 41.153 | -8.643 | Porto (Portugal)        |
| DB19908      | REF I (CZ 1)          | <i>P. bocagei</i>    | A         | F   | 41.153 | -8.643 | Porto (Portugal)        |
| DB19909      | REF I (CZ 1)          | <i>P. bocagei</i>    | A         | F   | 41.153 | -8.643 | Porto (Portugal)        |
| DB19910      | REF I (CZ 1)          | <i>P. bocagei</i>    | A         | F   | 41.153 | -8.643 | Porto (Portugal)        |
| DB19911      | REF I (CZ 1)          | <i>P. bocagei</i>    | A         | F   | 41.153 | -8.643 | Porto (Portugal)        |
| DB19912      | REF I (CZ 1)          | <i>P. bocagei</i>    | A         | F   | 41.153 | -8.643 | Porto (Portugal)        |
| DB19913      | REF I (CZ 1)          | <i>P. bocagei</i>    | A         | F   | 41.153 | -8.643 | Porto (Portugal)        |
| DB19914      | REF I (CZ 1)          | <i>P. bocagei</i>    | A         | M   | 41.153 | -8.643 | Porto (Portugal)        |
| DB19915      | REF I (CZ 1)          | <i>P. bocagei</i>    | A         | M   | 41.153 | -8.643 | Porto (Portugal)        |
| DB19916      | REF I (CZ 1)          | <i>P. bocagei</i>    | A         | M   | 41.153 | -8.643 | Porto (Portugal)        |
| DB19917      | REF I (CZ 1)          | <i>P. bocagei</i>    | A         | M   | 41.153 | -8.643 | Porto (Portugal)        |
| DB19918      | REF I (CZ 1)          | <i>P. bocagei</i>    | A         | M   | 41.153 | -8.643 | Porto (Portugal)        |
| DB19919      | REF I (CZ 1)          | <i>P. bocagei</i>    | A         | M   | 41.153 | -8.643 | Porto (Portugal)        |
| DB19920      | REF I (CZ 1)          | <i>P. bocagei</i>    | A         | M   | 41.153 | -8.643 | Porto (Portugal)        |
| DB19923      | REF I (CZ 1)          | <i>P. bocagei</i>    | J         | Unk | 41.153 | -8.643 | Porto (Portugal)        |
| DB19618      | REF II (CZ 1,2,3)     | <i>P. carbonelli</i> | A         | F   | 40.766 | -8.710 | Torreira (Portugal)     |
| DB19619      | REF II (CZ 1,2,3)     | <i>P. carbonelli</i> | A         | M   | 40.766 | -8.710 | Torreira (Portugal)     |
| DB19620      | REF II (CZ 1,2,3)     | <i>P. carbonelli</i> | A         | F   | 40.766 | -8.710 | Torreira (Portugal)     |
| DB19621      | REF II (CZ 1,2,3)     | <i>P. carbonelli</i> | A         | M   | 40.766 | -8.710 | Torreira (Portugal)     |

| Sample label | Contact zone analysed | Field ID               | Age class | Sex | Lat.   | Long.  | Location name (country)     |
|--------------|-----------------------|------------------------|-----------|-----|--------|--------|-----------------------------|
| DB19622      | REF II (CZ 1,2,3)     | <i>P. carbonelli</i>   | A         | M   | 40.766 | -8.710 | Torreira (Portugal)         |
| DB19624      | REF II (CZ 1,2,3)     | <i>P. carbonelli</i>   | A         | M   | 40.766 | -8.710 | Torreira (Portugal)         |
| DB19625      | REF II (CZ 1,2)       | <i>P. carbonelli</i>   | A         | F   | 40.766 | -8.710 | Torreira (Portugal)         |
| DB19626      | REF II (CZ 1,2,3)     | <i>P. carbonelli</i>   | A         | M   | 40.766 | -8.710 | Torreira (Portugal)         |
| DB19627      | REF II (CZ 1,2,3)     | <i>P. carbonelli</i>   | A         | M   | 40.766 | -8.710 | Torreira (Portugal)         |
| DB19628      | REF II (CZ 1,2,3)     | <i>P. carbonelli</i>   | A         | M   | 40.766 | -8.710 | Torreira (Portugal)         |
| DB19629      | REF II (CZ 1,3)       | <i>P. carbonelli</i>   | A         | M   | 40.766 | -8.710 | Torreira (Portugal)         |
| DB19630      | REF II (CZ 1,3)       | <i>P. carbonelli</i>   | A         | M   | 40.766 | -8.710 | Torreira (Portugal)         |
| DB19631      | REF II (CZ 1,3)       | <i>P. carbonelli</i>   | A         | M   | 40.766 | -8.710 | Torreira (Portugal)         |
| DB19632      | REF II (CZ 1,3)       | <i>P. carbonelli</i>   | A         | M   | 40.766 | -8.710 | Torreira (Portugal)         |
| DB19633      | REF II (CZ 1,3)       | <i>P. carbonelli</i>   | A         | M   | 40.766 | -8.710 | Torreira (Portugal)         |
| DB19634      | REF II (CZ 1,3)       | <i>P. carbonelli</i>   | A         | M   | 40.766 | -8.710 | Torreira (Portugal)         |
| DB19635      | REF II (CZ 1,3)       | <i>P. carbonelli</i>   | A         | F   | 40.766 | -8.710 | Torreira (Portugal)         |
| DB19636      | REF II (CZ 1,3)       | <i>P. carbonelli</i>   | A         | M   | 40.766 | -8.710 | Torreira (Portugal)         |
| DB19638      | REF II (CZ 1,3)       | <i>P. carbonelli</i>   | A         | F   | 40.766 | -8.710 | Torreira (Portugal)         |
| DB19639      | REF II (CZ 1,3)       | <i>P. carbonelli</i>   | A         | F   | 40.766 | -8.710 | Torreira (Portugal)         |
| DB19640      | REF II (CZ 1)         | <i>P. carbonelli</i>   | A         | F   | 40.766 | -8.710 | Torreira (Portugal)         |
| DB19641      | REF II (CZ 1)         | <i>P. carbonelli</i>   | A         | F   | 40.766 | -8.710 | Torreira (Portugal)         |
| DB19642      | REF II (CZ 1)         | <i>P. carbonelli</i>   | A         | M   | 40.766 | -8.710 | Torreira (Portugal)         |
| DB24438      | REF III (CZ 2)        | <i>P. virescens</i>    | A         | M   | 40.672 | -8.393 | Moita (Portugal)            |
| DB24439      | REF III (CZ 2)        | <i>P. virescens</i>    | A         | M   | 40.672 | -8.395 | Moita (Portugal)            |
| DB24445      | REF III (CZ 2)        | <i>P. virescens</i>    | A         | M   | 40.671 | -8.393 | Moita (Portugal)            |
| DB24453      | REF III (CZ 2)        | <i>P. virescens</i>    | A         | F   | 40.670 | -8.392 | Moita (Portugal)            |
| DB24441      | REF III (CZ 2)        | <i>P. virescens</i>    | A         | F   | 40.670 | -8.392 | Moita (Portugal)            |
| DB24442      | REF III (CZ 2)        | <i>P. virescens</i>    | A         | F   | 40.672 | -8.394 | Moita (Portugal)            |
| DB24451      | REF III (CZ 2)        | <i>P. virescens</i>    | A         | Unk | 40.671 | -8.392 | Moita (Portugal)            |
| DB22654      | REF IV (CZ 3)         | <i>P.g.lusitanicus</i> | A         | F   | 40.351 | -7.095 | Sabugal (Portugal)          |
| DB22655      | REF IV (CZ 3)         | <i>P.g.lusitanicus</i> | A         | M   | 40.351 | -7.095 | Sabugal (Portugal)          |
| DB22656      | REF IV (CZ 3)         | <i>P.g.lusitanicus</i> | A         | M   | 40.351 | -7.095 | Sabugal (Portugal)          |
| DB22657      | REF IV (CZ 3)         | <i>P.g.lusitanicus</i> | A         | M   | 40.351 | -7.095 | Sabugal (Portugal)          |
| DB22658      | REF IV (CZ 3)         | <i>P.g.lusitanicus</i> | A         | M   | 40.351 | -7.095 | Sabugal (Portugal)          |
| DB22659      | REF IV (CZ 3)         | <i>P.g.lusitanicus</i> | A         | M   | 40.351 | -7.095 | Sabugal (Portugal)          |
| DB22660      | REF IV (CZ 3)         | <i>P.g.lusitanicus</i> | A         | F   | 40.351 | -7.095 | Sabugal (Portugal)          |
| DB22661      | REF IV (CZ 3)         | <i>P.g.lusitanicus</i> | A         | M   | 40.351 | -7.095 | Sabugal (Portugal)          |
| DB22662      | REF IV (CZ 3)         | <i>P.g.lusitanicus</i> | A         | F   | 40.351 | -7.095 | Sabugal (Portugal)          |
| DB22663      | REF IV (CZ 3)         | <i>P.g.lusitanicus</i> | A         | F   | 40.351 | -7.095 | Sabugal (Portugal)          |
| DB24411      | REF IV (CZ 3)         | <i>P.g.lusitanicus</i> | A         | F   | 40.351 | -7.095 | Sabugal (Portugal)          |
| DB24412      | REF IV (CZ 3)         | <i>P.g.lusitanicus</i> | A         | M   | 40.351 | -7.095 | Sabugal (Portugal)          |
| DB24413      | REF IV (CZ 3)         | <i>P.g.lusitanicus</i> | A         | F   | 40.351 | -7.095 | Sabugal (Portugal)          |
| DB24414      | REF IV (CZ 3)         | <i>P.g.lusitanicus</i> | A         | M   | 40.351 | -7.095 | Sabugal (Portugal)          |
| DB24415      | REF IV (CZ 3)         | <i>P.g.lusitanicus</i> | A         | F   | 40.351 | -7.095 | Sabugal (Portugal)          |
| DB24425      | REF IV (CZ 3)         | <i>P.g.lusitanicus</i> | A         | M   | 40.351 | -7.095 | Sabugal (Portugal)          |
| DB24426      | REF IV (CZ 3)         | <i>P.g.lusitanicus</i> | A         | M   | 40.351 | -7.095 | Sabugal (Portugal)          |
| DB24428      | REF IV (CZ 3)         | <i>P.g.lusitanicus</i> | A         | M   | 40.351 | -7.095 | Sabugal (Portugal)          |
| DB22121      | REF V (CZ 4)          | <i>P. carbonelli</i>   | A         | M   | 37.048 | -6.567 | El Acebuche (Spain)         |
| DB22129      | REF V (CZ 4)          | <i>P. carbonelli</i>   | A         | F   | 37.048 | -6.567 | El Acebuche (Spain)         |
| DB22133      | REF V (CZ 4)          | <i>P. carbonelli</i>   | A         | M   | 37.048 | -6.567 | El Acebuche (Spain)         |
| DB22135      | REF V (CZ 4)          | <i>P. carbonelli</i>   | A         | M   | 37.048 | -6.567 | El Acebuche (Spain)         |
| DB22136      | REF V (CZ 4)          | <i>P. carbonelli</i>   | A         | M   | 37.048 | -6.567 | El Acebuche (Spain)         |
| DB22120      | REF V (CZ 4)          | <i>P. carbonelli</i>   | A         | F   | 37.048 | -6.567 | El Acebuche (Spain)         |
| DB21569      | REF V (CZ 4)          | <i>P. carbonelli</i>   | S         | M   | 37.048 | -6.567 | El Acebuche (Spain)         |
| DB22128      | REF V (CZ 4)          | <i>P. carbonelli</i>   | A         | F   | 37.048 | -6.567 | El Acebuche (Spain)         |
| DB22134      | REF V (CZ 4)          | <i>P. carbonelli</i>   | A         | M   | 37.048 | -6.567 | El Acebuche (Spain)         |
| DB22138      | REF V (CZ 4)          | <i>P. carbonelli</i>   | A         | M   | 37.048 | -6.567 | El Acebuche (Spain)         |
| DB11186      | REF VI (CZ 4)         | <i>P. vaucheri</i>     | A         | M   | 36.373 | -6.187 | Playa de la Barrosa (Spain) |
| DB11187      | REF VI (CZ 4)         | <i>P. vaucheri</i>     | A         | M   | 36.373 | -6.187 | Playa de la Barrosa (Spain) |
| DB11198      | REF VI (CZ 4)         | <i>P. vaucheri</i>     | A         | F   | 36.373 | -6.187 | Playa de la Barrosa (Spain) |
| DB11255      | REF VI (CZ 4)         | <i>P. vaucheri</i>     | A         | F   | 36.373 | -6.187 | Playa de la Barrosa (Spain) |
| AK8.60       | REF VII (CZ 4)        | <i>P. vaucheri</i>     | A         | F   | 36.490 | -4.776 | Playa de la Vibora (Spain)  |
| AK8.61       | REF VII (CZ 4)        | <i>P. vaucheri</i>     | A         | M   | 36.490 | -4.776 | Playa de la Vibora (Spain)  |
| AK8.62       | REF VII (CZ 4)        | <i>P. vaucheri</i>     | A         | M   | 36.490 | -4.776 | Playa de la Vibora (Spain)  |
| AK8.63       | REF VII (CZ 4)        | <i>P. vaucheri</i>     | A         | M   | 36.490 | -4.776 | Playa de la Vibora (Spain)  |

**Table S2.** Mean, minimum (Min.) and maximum (Max.) depth of coverage values by individual (ind.) and by locus for each dataset and contact zone (CZ). Contact zone numbers as in Fig. 1.

| <b>Contact zone</b>       |                   | <b>CZ1</b> | <b>CZ2</b> | <b>CZ3</b> | <b>CZ4</b> |
|---------------------------|-------------------|------------|------------|------------|------------|
| <b>Complete dataset</b>   | <b>Min./ind.</b>  | 10.473     | 10.891     | 11.195     | 10.138     |
|                           | <b>Max./ind.</b>  | 47.829     | 45.287     | 69.420     | 93.777     |
|                           | <b>Mean/ind.</b>  | 28.483     | 28.479     | 29.560     | 38.467     |
|                           | <b>Min./locus</b> | 11.902     | 12.871     | 16.742     | 14.210     |
|                           | <b>Max./locus</b> | 75.632     | 114.058    | 142.821    | 170.617    |
|                           | <b>Mean/locus</b> | 28.619     | 28.613     | 29.759     | 38.686     |
| <b>Diagnostic dataset</b> | <b>Min./ind.</b>  | 11.902     | 8.715      | 10.741     | 9.535      |
|                           | <b>Max./ind.</b>  | 75.632     | 49.485     | 64.906     | 110.927    |
|                           | <b>Mean/ind.</b>  | 47.056     | 30.616     | 31.161     | 44.396     |
|                           | <b>Min./locus</b> | 10.164     | 13.462     | 21.182     | 22.988     |
|                           | <b>Max./locus</b> | 47.396     | 98.964     | 50.937     | 108.519    |
|                           | <b>Mean/locus</b> | 28.266     | 30.805     | 31.351     | 44.764     |



**Table S3.** Fisher's exact tests results on differences of overall genotypic hybrid composition (Parental vs. total admixed genotypes) and on the contributions of recent hybridization events among contact zones (Parental and latter generation hybrids vs. recent generation hybrids). Additionally to the global tests, pairwise comparisons were performed for the overall genotypic hybrid composition since the global test was statistically significant. \* indicates the significant test ( $p < 0.05$ ) and # indicates the significant tests after Bonferroni correction (significant at  $p$ -value  $< 8.33 \times 10^{-3}$ ). Contact zone (CZ) numbers as in Fig. 1.

| Test                                                                            |                        | <i>p</i> -value         |                         |
|---------------------------------------------------------------------------------|------------------------|-------------------------|-------------------------|
| Parental<br>vs.<br>total admixed<br>genotypes                                   | Global comparison      | $8.29 \times 10^{-9}$ * |                         |
|                                                                                 | Pairwise<br>comparison | CZ1 x CZ2               | $1.29 \times 10^{-4}$ # |
|                                                                                 |                        | CZ1 x CZ3               | 0.28                    |
|                                                                                 |                        | CZ1 x CZ4               | $1.29 \times 10^{-3}$ # |
|                                                                                 |                        | CZ2 x CZ3               | $1.33 \times 10^{-2}$ # |
|                                                                                 |                        | CZ2 x CZ4               | $2.42 \times 10^{-9}$ # |
|                                                                                 | CZ3 x CZ4              | $2.08 \times 10^{-4}$ # |                         |
| Parental and later<br>generation hybrids<br>vs.<br>recent generation<br>hybrids | Global comparison      | 0.12                    |                         |

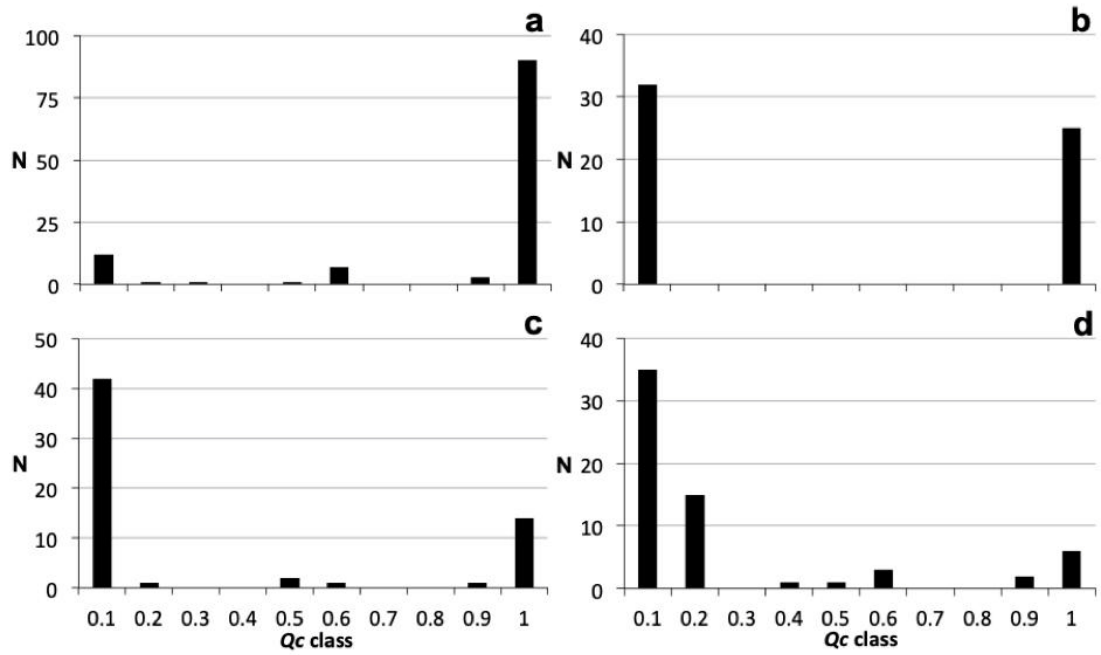

**Fig. S1.** Distribution of  $Q_c$  scores in 10 classes of equal size within each contact zone, derived from the multilocus genotype assignment analysis with the complete dataset for each contact zone. **a** *P. bocagei* x *P. carbonelli* (contact zone 1); **b** *P. virescens* x *P. carbonelli* (contact zone 2); **c** *P. g. lusitanicus* x *P. carbonelli* (contact zone 3); and **d** *P. vaucheri* x *P. carbonelli* (contact zone 4).
